# Supplementary material for: Synthesis, characterization and properties of new heat resistant energetic materials based on two C–C bridged pyrazole and benzene skeletons
Source: Royal Society of Chemistry journal article supplement (doi:10.1039/d3ce00530e), 2023-01-01
Supplement: d3ce00530e1.pdf [file d3ce00530e1.pdf]

## Supplementary Information

### Synthesis, characterization and properties of new heat resistant energetic materials based on two C-C bridged pyrazole and benzene skeletons

Rogzheng Zhang <sup>a</sup>, Yuangang Xu <sup>a\*</sup>, Feng Yang <sup>a</sup>, Pengcheng Wang <sup>a</sup>,  
Qiuhan Lin <sup>a</sup>, Hui Huang <sup>b</sup>, Ming Lu <sup>a,\*</sup>

<sup>a</sup> School of Chemistry and Chemical Engineering, Nanjing University of Science and Technology, Nanjing 210094, China

<sup>b</sup> Institute of Chemical Materials, China Academy of Engineering Physics, Mianyang 621900, China

\* Corresponding authors: [luming@njjust.edu.cn](mailto:luming@njjust.edu.cn), [yuangangxu@163.com](mailto:yuangangxu@163.com)

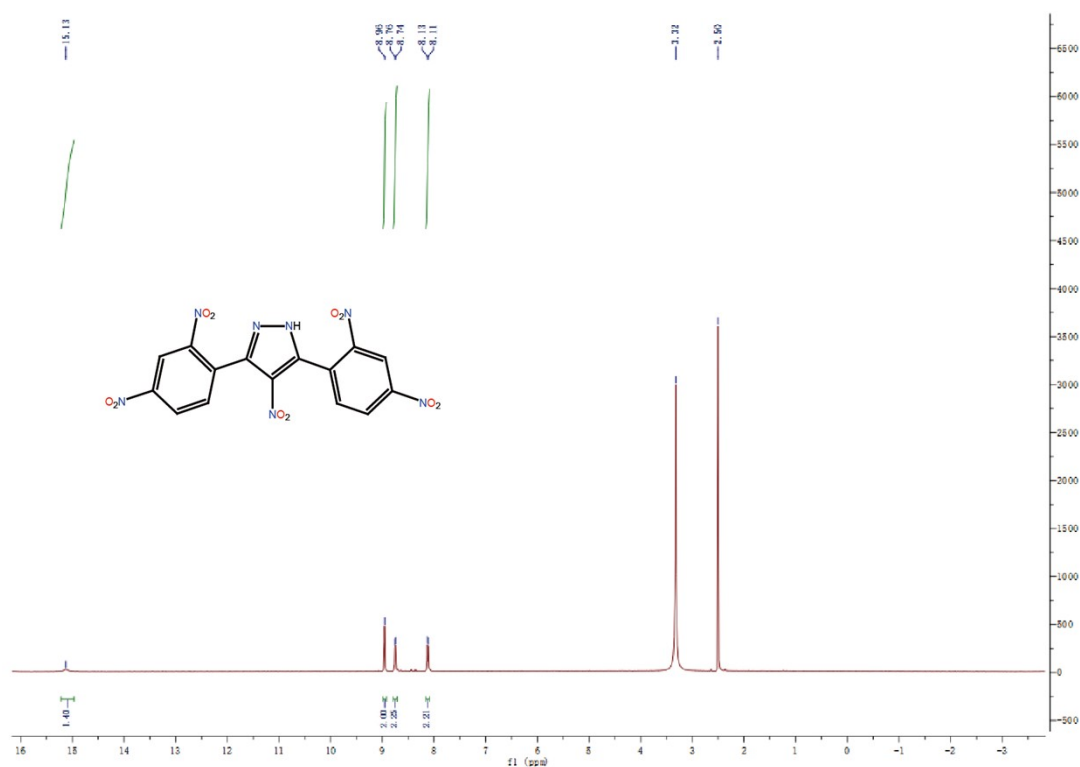

Fig. S1 <sup>1</sup>H NMR of **1C** (DMSO-*d*<sub>6</sub>)

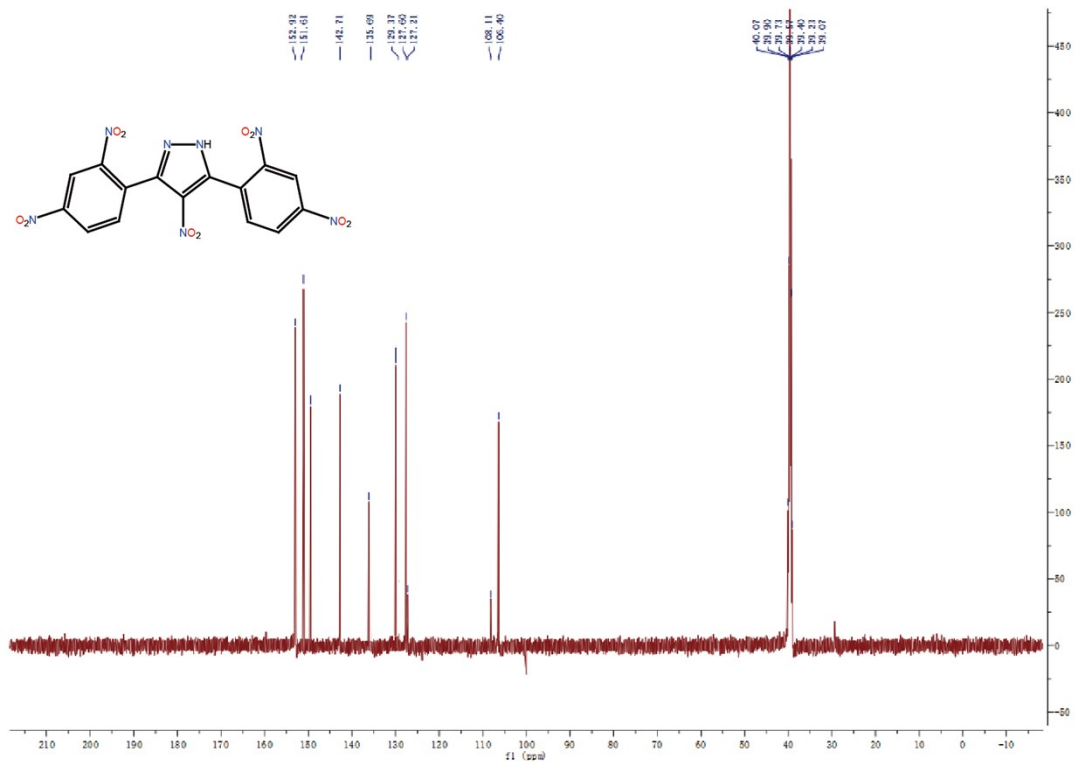

Fig. S2  $^{13}\text{C}$  NMR of 1C (DMSO- $d_6$ )

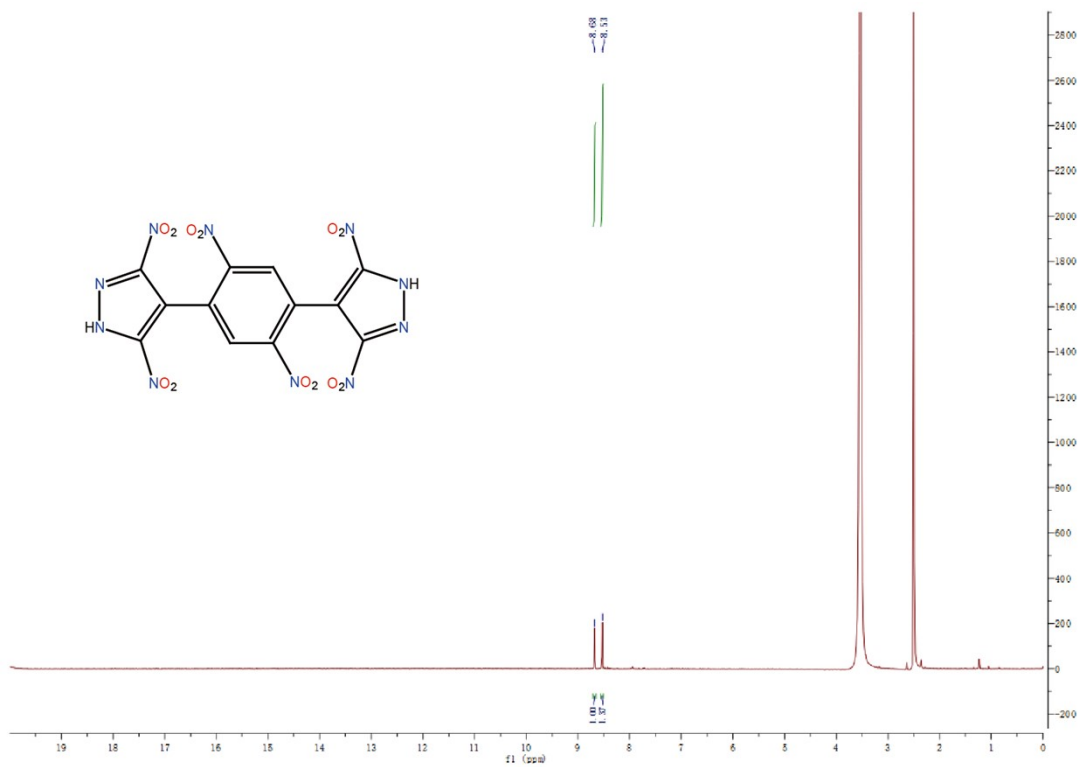

Fig. S3  $^1\text{H}$  NMR of 2C (DMSO- $d_6$ )

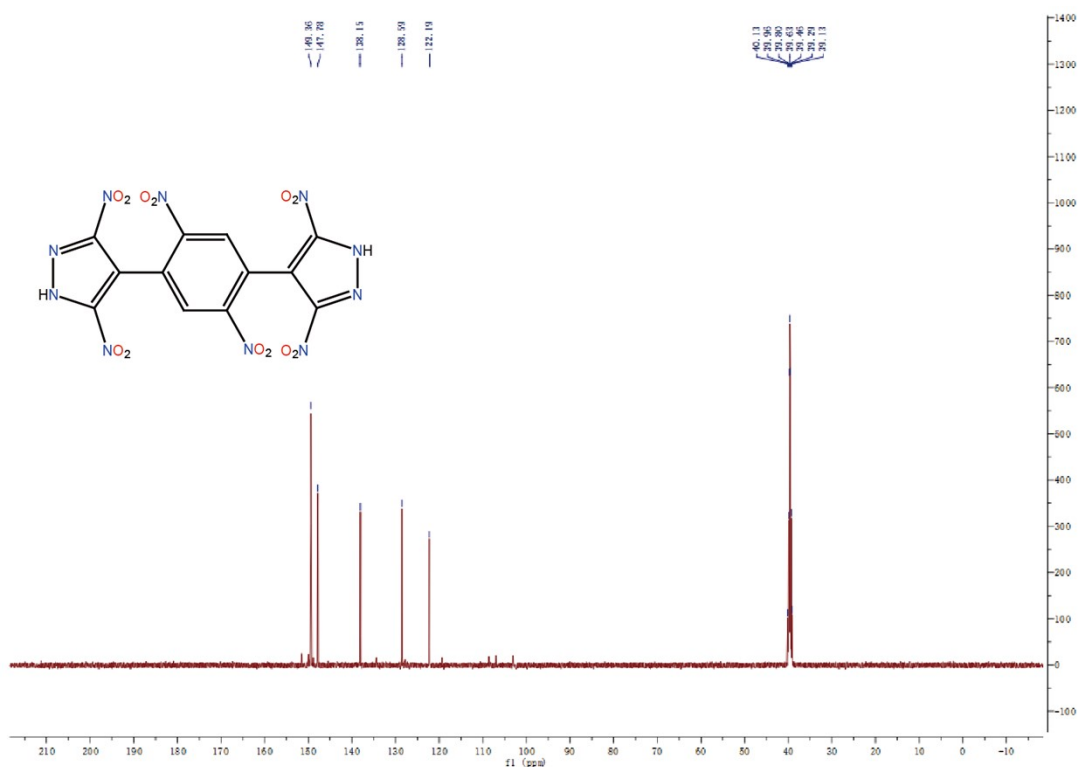

Fig. S4  $^{13}\text{C}$  NMR of **2C** ( $\text{DMSO-}d_6$ )

**Table.S1 Crystal data and structure refinement for  $1\text{c}\cdot\text{CH}_3\text{OH}$  and  $2\text{c}\cdot\text{CH}_3\text{OH}$**

| Empirical formula                  | $\text{C}_{16}\text{H}_{11}\text{N}_7\text{O}_{11}$ | $\text{C}_{14}\text{H}_{12}\text{N}_{10}\text{O}_{14}$ |
|------------------------------------|-----------------------------------------------------|--------------------------------------------------------|
| Formula weight                     | 477.32                                              | 544.34                                                 |
| Temperature/K                      | 296                                                 | 296                                                    |
| Crystal system                     | Monoclinic                                          | Triclinic                                              |
| Space group                        | $\text{P } 2_1/c$                                   | $\text{P } -1$                                         |
| $a/\text{\AA}$                     | 26.806(4)                                           | 6.2299(6)                                              |
| $b/\text{\AA}$                     | 7.7681(10)                                          | 7.4168(7)                                              |
| $c/\text{\AA}$                     | 20.357(3)                                           | 12.7696(12)                                            |
| $\alpha/^\circ$                    | 90                                                  | 103.819(3)                                             |
| $\beta/^\circ$                     | 112.251                                             | 90.179(3)                                              |
| $\gamma/^\circ$                    | 90                                                  | 95.701(3)                                              |
| Volume/ $\text{\AA}^3$             | 3923.3(10)                                          | 569.90(9)                                              |
| Z                                  | 8                                                   | 1                                                      |
| $\rho_{\text{calc}}/\text{g/cm}^3$ | 1.616                                               | 1.586                                                  |

|                                               |                                                                |                                                              |
|-----------------------------------------------|----------------------------------------------------------------|--------------------------------------------------------------|
| $\mu/\text{mm}^{-1}$                          | 0.140                                                          | 0.144                                                        |
| F(000)                                        | 1952                                                           | 278                                                          |
| Crystal size/ $\text{mm}^3$                   | 0.220×0.200×0.120                                              | 0.220×0.200×0.120                                            |
| Radiation                                     | MoK $\alpha$ ( $\lambda=0.71073$ )                             | MoK $\alpha$ ( $\lambda = 0.71073$ )                         |
| Theta range for data collection/ $^\circ$     | 0.821 to 24.997                                                | 2.843 to 27.551                                              |
| Index ranges                                  | -31 $\leq h \leq$ 31, -9 $\leq k \leq$ 9, -21 $\leq l \leq$ 20 | -8 $\leq h \leq$ 7, -9 $\leq k \leq$ 9, -16 $\leq l \leq$ 16 |
| Reflections collected                         | 27370                                                          | 8294                                                         |
| Independent reflections                       | 6638 [R(int) = 0.0818]                                         | 2614 [R(int) = 0.0315]                                       |
| Data/restraints/parameters                    | 6638/0/617                                                     | 2614/0/174                                                   |
| Goodness-of-fit on F <sup>2</sup>             | 1.054                                                          | 1.016                                                        |
| Final R indexes [I $\geq 2\sigma$ (I)]        | R1 = 0.0702, wR2 = 0.1647                                      | R1 = 0.0503, wR2 = 0.1166                                    |
| Final R indexes [all data]                    | R1 = 0.1105, wR2 = 0.1870                                      | R1 = 0.0898, wR2 = 0.1346                                    |
| Largest diff. peak/hole / e $\text{\AA}^{-3}$ | 0.291 and -0.291                                               | 0.220 and -0.249                                             |
| CCDC                                          | 2248516                                                        | 2248513                                                      |
